# Supplementary material for: The Development of a Standardized Quality Assessment Material to Support Xpert HIV-1 Viral Load Testing for ART Monitoring in South Africa
Source: Preprints.org preprint supplement (doi:10.20944/preprints202012.0010.v1), 2020-12-01
Supplement: Supplementary file 1 [file supplementary]

**Supplementary Table S1: Detailed Site Verification Summary: September 2017-November 2018**

Modules verified at each of thirteen sites are shown, with error codes highlighted. The initial verification panels had a high number of volume errors, which led to operating procedure changes. A score of ≤4/6 was unacceptable and the module required retesting. Replaced modules were also tested before patient specimen testing commenced.

| **Site/Panel** | **Module** | **Expected HIV VL** | **Difference (log cp/mL)** | **Score** | **Outcome** |
| --- | --- | --- | --- | --- | --- |
| **Site 1** | A1 | Negative | 0.00 | 6/6 | Pass |
| Low | 0.11 |
| High | 0.29 |
| A2 | Negative | Error2097 | 5/6 | Acceptable |
| Low | -0.10 |
| High | 0.08 |
| A3 | Negative | 0.00 | 6/6 | Pass |
| Low | -0.20 |
| High | 0.19 |
| A4 | Negative | 0.00 | 6/6 | Pass |
| Low | -0.20 |
| High | 0.31 |
| **Site 2** | A1 | Negative | 0.00 | 6/6 | Pass |
| Low | -0.11 |
| High | 0.09 |
| A2 | Negative | 0.00 | 6/6 | Pass |
| Low | -0.08 |
| High | -0.04 |
| A3 | Negative | 0.00 | 6/6 | Pass |
| Low | 0.05 |
| High | 0.06 |
| A4 | Negative | 0.00 | 6/6 | Pass |
| Low | -0.20 |
| High | 0.91 |
| **Module**  **Replacement** | A3 | Negative | 0.00 | 5/6 | Acceptable |
| Low | -0.05 |
| High | Invalid |
| **Site 3**  **V17V11WA1** | A1 | Negative | 0.00 | 6/6 | Pass |
| Low | -0.07 |
| High | 0.27 |
| A2 | Negative | 0.00 | 6/6 | Pass |
| Low | 0.12 |
| High | -0.03 |
| A3 | Negative | 0.00 | 6/6 | Pass |
| Low | -0.21 |
| High | -0.01 |
| A4 | Negative | Error2097 | 5/6 | Acceptable |
| Low | -0.27 |
| High | 0.02 |
| **Module**  **Replacement** | B3 | Negative | 0.00 | 6/6 | Pass |
| Low | -0.10 |
| High | -0.26 |
| **Site 4** | A1 | Negative | 0.00 | 6/6 | Pass |
| Low | 0.33 |
| High | 0.25 |
| A2 | Negative | 0.00 | 6/6 | Pass |
| Low | -0.27 |
| High | 0.05 |
| A3 | Negative | 0.00 | 5/6 | Acceptable |
| Low | 0.15 |
| High | Error2005 |
| A4 | Negative | 0.00 | 6/6 | Pass |
| Low | -0.16 |
| High | 0.14 |
| **Site 5** | A1 | Negative | 0.00 | 5/6 | Acceptable |
| Low | Error5017 |
| High | 0.19 |
| A2 | Negative | 0.00 | 6/6 | Pass |
| Low | 0.01 |
| High | -0.11 |
| A3 | Negative | 0.00 | 6/6 | Pass |
| Low | -0.22 |
| High | -0.01 |
| A4 | Negative | 0.00 | 6/6 | Pass |
| Low | -0.15 |
| High | 0.27 |
| **Site 6** | A1 | Negative | 0.00 | 6/6 | Pass |
| Low | 0.01 |
| High | 0.20 |
| A2 | Negative | Error2096 | 5/6 | Acceptable |
| Low | -0.34 |
| High | 0.07 |
| A3 | Negative | Error2096 | 5/6 | Acceptable |
| Low | 0.05 |
| High | -0.13 |
| A4 | Negative | Error2096 | 5/6 | Acceptable |
| Low | -0.13 |
| High | 0.14 |
| **Site 7** | A1 | Negative | 0.00 | 5/6 | Acceptable |
| Low | Error2005 |
| High | 0.04 |
| A2 | Negative | 0.00 | 6/6 | Pass |
| Low | -0.03 |
| High | -0.01 |
| A3 | Negative | 0.00 | 6/6 | Pass |
| Low | -0.03 |
| High | -0.08 |
| A4 | Negative | 0.00 | 5/6 | Acceptable |
| Low | Error5007 |
| High | 0.25 |
| **Module**  **Replacement** | A4 | Negative | 0.00 | 6/6 | Pass |
| Low | -0.15 |
| High | -0.19 |
| **Site 8** | A1 | Negative | 0.00 | 6/6 | Pass |
| Low | -0.20 |
| High | 0.01 |
| A2 | Negative | 0.00 | 6/6 | Pass |
| Low | 0.06 |
| High | 0.04 |
| A3 | Negative | 0.00 | 6/6 | Pass |
| Low | 0.07 |
| High | 0.16 |
| A4 | Negative | 0.00 | 6/6 | Pass |
| Low | -0.07 |
| High | 0.17 |
| **Site 9** | A1 | Negative | Error2097 | 5/6 | Acceptable |
| Low | -0.25 |
| High | 0.41 |
| A2 | Negative | Error5017 | 5/6 | Acceptable |
| Low | -0.13 |
| High | 0.05 |
| A3 | Negative | 0.00 | 6/6 | Pass |
| Low | -0.06 |
| High | 0.07 |
| A4 | Negative | Invalid (5016) | 5/6 | Acceptable |
| Low | -0.34 |
| High | 0.27 |
| **Site 10** | A1 | Negative | 0.00 | 6/6 | Pass |
| Low | -0.16 |
| High | 0.12 |
| A2 | Negative | 0.00 | 6/6 | Pass |
| Low | -0.32 |
| High | -0.03 |
| A3 | Negative | 0.00 | 6/6 | Pass |
| Low | 0.03 |
| High | 0.00 |
| A4 | Negative | Error2096 | 4/6 | Unacceptable |
| Low | -0.1 |
| High | Error5017 |
| **Verification**  **Repeat** | A4 | Negative | 0.0 | 6/6 | Pass |
| Low | 0.1 |
| High | 0.1 |
| **Site 11** | A1 | Negative | Error2096 | 5/6 | Acceptable |
| Low | -0.06 |
| High | 0.25 |
| A2 | Negative | 0.00 | 6/6 | Pass |
| Low | 0.13 |
| High | 0.03 |
| A3 | Negative | 0.00 | 6/6 | Pass |
| Low | 0.05 |
| High | -0.02 |
| A4 | Negative | Error2096 | 5/6 | Acceptable |
| Low | 0.17 |
| High | 0.20 |
| **Site 12** | A1 | Negative | 0.00 | 5/6 | Acceptable |
| Low | Invalid (5016) |
| High | 0.27 |
| A2 | Negative | 0.00 | 6/6 | Pass |
| Low | -0.36 |
| High | 0.06 |
| A3 | Negative | 0.00 | 6/6 | Pass |
| Low | -0.14 |
| High | -0.20 |
| A4 | Negative | 0.00 | 6/6 | Pass |
| Low | -0.25 |
| High | 0.10 |
| **Module**  **Replacement** | A4 | Negative | 0.00 | 6/6 | Pass |
| Low | -0.19 |
| High | -0.30 |
| **Site 13** | A1 | Negative | 0.00 | 6/6 | Pass |
| Low | -0.34 |
| High | 0.16 |
| A2 | Negative | Error2097 | 5/6 | Acceptable |
| Low | -0.33 |
| High | 0.05 |
| A3 | Negative | 0.00 | 6/6 | Pass |
| Low | 0.08 |
| High | -0.02 |
| A4 | Negative | Error2096 | 5/6 | Acceptable |
| Low | 0.00 |
| High | 0.22 |
| **Module**  **Replacement** | A1 | Negative | 0.00 | 6/6 | Pass |
| Low | -0.06 |
| High | -0.23 |

**Supplementary Table S2: Detailed Site EQA Summary: September 2017-November 2018**

EQA results from instruments tested at each of thirteen sites are shown, with error codes highlighted. A score of ≤7/8 was unacceptable and it was recommended that EQA was repeated after root cause analysis and corrective actions.

| **Site** | **Score** | **Outcome** | **Comment** | **Log Difference (copies/ml)** | | | |
| --- | --- | --- | --- | --- | --- | --- | --- |
| **Neg** | **Log 3.0** | **Log 3.7** | **Log 4.7** |
| **EQA Round 1 2018** | | | | | | | |
| **1** | 8/8 | Pass |  | 0 | -0.30 | 0.00 | 0.05 |
| **2** | 8/8 | Pass |  | 0 | -0.03 | 0.12 | 0.10 |
| **3** | 8/8 | Pass |  | 0 | 0.14 | 0.15 | 0.01 |
| **4** | 8/8 | Pass |  | 0 | -0.04 | 0.04 | 0.16 |
| **5** | 8/8 | Pass |  | 0 | -0.01 | 0.06 | 0.02 |
| **6** | 7/8 | Acceptable | Load volume error | 0 | ERR-2097 | 0.07 | -0.03 |
| **7** | 8/8 | Pass |  | 0 | 0.05 | 0.00 | 0.10 |
| **8** | 8/8 | Pass |  | 0 | 0.07 | 0.00 | -0.02 |
| **9** | 8/8 | Pass |  | 0 | -0.04 | 0.18 | 0.14 |
| **10** | 8/8 | Pass |  | 0 | -0.02 | 0.06 | 0.03 |
| **11** | 8/8 | Pass |  | 0 | 0.08 | 0.17 | 0.12 |
| **12** | 8/8 | Pass |  | 0 | -0.17 | 0.01 | -0.11 |
| **13** | 8/8 | Pass |  | 0 | 0.06 | 0.05 | 0.11 |
| **Mean** | | | | **0** | **-0.08** | **0.04** | **-0.05** |
| **Range** | | | | **0, 0** | **-0.36, 0.08** | **-0.07, 0.16** | **-0.21, 0.06** |
| **Standard Deviation** | | | | **0** | **0.11** | **0.07** | **0.08** |
| **1** | 8/8 | Pass |  | 0 | -0.05 | -0.02 | -0.01 |
| **EQA Round 2 2018** | | | | | | | |
| **2** | 8/8 | Pass |  | 0 | 0.10 | 0.14 | 0.15 |
| **3** | 8/8 | Pass |  | 0 | -0.10 | -0.02 | 0.01 |
| **4** | 8/8 | Pass |  | 0 | -0.07 | 0.06 | 0.05 |
| **5** | 7/8 | Acceptable | Loading error | 0 | -0.10 | 0.02 | ERR-2096 |
| **6** | 8/8 | Pass |  | 0 | -0.07 | 0.02 | 0.04 |
| **7** | 8/8 | Pass |  | 0 | 0.16 | 0.04 | 0.01 |
| **8** | 8/8 | Pass |  | 0 | -0.19 | -0.06 | 0.02 |
| **9** | 8/8 | Pass |  | 0 | -0.26 | -0.01 | -0.03 |
| **10** | 8/8 | Pass |  | 0 | -0.14 | 0.06 | 0.08 |
| **11** | 8/8 | Pass |  | 0 | -0.13 | -0.07 | 0.04 |
| **12** | 8/8 | Pass |  | 0 | 0.06 | 0.07 | 0.10 |
| **13** | 8/8 | Pass |  | 0 | -0.12 | 0.06 | 0.00 |
| **Mean** | | | | **0** | **-0.07** | **0.03** | **0.03** |
| **Range** | | | | **0, 0** | **-0.26, 0.16** | **-0.07, 0.17** | **-0.03, 0.15** |
| **Standard Deviation** | | | | **0** | **0.12** | **0.07** | **0.05** |
